# Supplementary material for: RBM14 enhances transcriptional activity of p23 regulating CXCL1 expression to induce EMT in lung cancer
Source: Research Square preprint supplement (doi:10.21203/rs.3.rs-3842489/v1), 2024-02-09
Supplement: Supplementary file 1 [file 1bd76e2fb9a64fb36895b071.xlsx]

## Sheet: Sheet1
Prmers	Sequences
CXCL1	AGGGAATTCACCCCAAGAAC
	TGGATTTGTCACTGTTCAGCA
RBM14	GCAAAGAAGTGAAGGGCAAG
	AAAGCCTGCTGGTAGTCGAA
p23	TGCTTCTGCAAAGTGGTACG
	GCTTGGAATCATTTGGATCA
E-Cadherin	TGCCCAGAAAATGAAAAAGG
	GTGTATGTGGCAATGCGTTC
N-Cadherin	TTCCAACCTTCACCTTGACC
	CCAGGTCTTGAGCAGTGACA
Vimentin	GAGAACTTTGCCGTTGAAGC
	TCCAGCAGCTTCCTGTAGGT
CXCL8	GTGCAGTTTTGCCAAGGAGT
	CTCTGCACCCAGTTTTCCTT
STC1	TCAGCTGAAGTGGTTCGTTG
	GACGAATGCTTTTCCCTGAG
EIF4E3	AAGACGTCGTCCAAGTCTGG
	GTGTTTTCCACGTCCACCTT
F3	GACCTCACCGACGAGATTGT
	CCGAGGTTTGTCTCCAGGTA
MROH6	GCCGTAACCAGCGTGTAAAT
	CAAGCAGCAGATGTGGGTAG
S100A9	TCATCAACACCTTCCACCAA
	GTGTCCAGGTCCTCCATGAT
ANKRD22	ATGCTGGCGTCGAAGTTAAT
	TCCGTGCAATATCCAGTGAG
XYLT1	TGTCTACGATGAGCCTGACG
	AAGCGGTCAGCAAGGAAGTA
PRODH	ACCACAGGTGCCTGGACTAC
	TCTGGTCACACATGCCTAGC
β-actin	AGAGCTACGAGCTGCCTGAC
	AGCACTGTGTTGGCGTACAG
