# Supplementary material for: RBM14 enhances transcriptional activity of p23 regulating CXCL1 expression to induce EMT in lung cancer
Source: Research Square preprint supplement (doi:10.21203/rs.3.rs-3842489/v1), 2024-02-09
Supplement: Supplementary file 2 [file add868349779e6a97b4ce566.xlsx]

## Sheet: Sheet1
Probes	Sequences
E1	TTCATGTTATACAGCCCTGGCTTCCACTGACGCTAACACTGG
	CCAGTGTTAGCGTCAGTGGAAGCCAGGGCTGTATAACATGAA
E2	ACTGGATTCAGCTTTTGACACTGATAATCTGTTGCCACCAAATGG
	CCATTTGGTGGCAACAGATTATCAGTGTCAAAAGCTGAATCCAGT
E3	AAATGGAAAACGTAAACAAGATATTCTAAGTGTGGTTAGAGAATATG
	CATATTCTCTAACCACACTTAGAATATCTTGTTTACGTTTTCCATTT
E4	AATATGCAACACAAGGAACAAGCAGAACATTCTTCTCTGGAATCTGA
	TCAGATTCCAGAGAAGAATGTTCTGCTTGTTCCTTGTGTTGCATATT
E5	ATCTGACATAATGGACTGTACTTTCACAGACAGCACTGATGTTAGAT
	ATCTAACATCAGTGCTGTCTGTGAAAGTACAGTCCATTATGTCAGAT
